# Supplementary material
Source: publisher figshare collection journal article supplement (https://geolsoc.figshare.com/ndownloader/files/23454062)
Supplement: Supplementary file 1 [file 23454062]

## Sheet: Feuil1
Supplementary Table 1. Data used and calculations performed for the determination of the slope S of the LMWL, mean intra-annual temperature range, Hela index and longitude F of the IAEA stations over Europe
N°	Station	Country	Latitude	Longitude	Elevation	slope S	S.D.	R2	T range	Hela index	F+15	log10(F+15)
					(m)				(°C)
1	VALENTIA (OBSERVATORY)	Ireland	51.93	-10.25	9	5.76	0.4733	0.936767	8.14	16.4613	4.75	0.676694
2	INCHNADAMPH	U.K.	58.15	-4.97	73						10.03	1.0013
3	BREST PLOUZANE	France	48.36	-4.57	80	6.827	0.6738	0.911243	10.3	22.8517	10.43	1.01828
4	ALTNABREAC	U.K.	58.38	-3.7	155				9.18	16.5091	11.3	1.05308
5	WALLINGFORD	U.K.	51.6	-1.1	48	6.674	0.2402	0.987212	12.7973	26.8204	13.9	1.14301
6	KEYWORTH	U.K.	52.88	-1.08	60	6.889	0.2402	0.987993	12.8889	26.332	13.92	1.14364
7	DAX	France	43.68	-1.06	9	6.1	0.4512	0.948118	14.01	35.0787	13.94	1.14426
8	CESTAS-PIERROTON	France	44.73	-0.77	59	6.032	0.5618	0.920182	16.2967	40.0331	14.23	1.1532
9	FLEAM DYKE	U.K.	52.16	-0.25	30	6.773	0.2764	0.983618	12.69	26.2832	14.75	1.16879
10	CAMPISTROUS	France	43.12	0.38	600				16.4	41.8386	15.38	1.18696
11	ORLEANS-LA-SOURCE	France	47.9	1.9	109	6.909	0.3632	0.973115	15.8	36.1213	16.9	1.22789
12	BRAAKMAN	Netherlands	51.3	3.75	2	7.331	0.7516	0.913578	14.6	30.9747	18.75	1.273
13	DE KOOY	Netherlands	52.93	4.78	1	7.308	0.8198	0.888219	14.05	28.7953	19.78	1.29623
14	GILZE-RIJEN	Netherlands	51.57	4.93	11	6.941	0.5127	0.948268	16.775	35.5919	19.93	1.29951
15	WIERINGERWERF	Netherlands	52.8	5.05	-4	7.316	1.3312	0.770447	14	28.7624	20.05	1.30211
16	DE BILT	Netherlands	52.1	5.18	2	7.048	0.4658	0.958143	15.51	32.4585	20.18	1.30492
17	LIEGE	Belgium	50.7	5.47	190	6.596	0.623	0.925675	15.3	32.9263	20.47	1.31112
18	BEEK	Netherlands	50.92	5.78	111	7.112	0.4183	0.96656	15.84	33.9813	20.78	1.31765
19	THONON-LES-BAINS	France	46.22	6.28	385	7.451	0.5773	0.943373	18.0311	42.9641	21.28	1.32797
20	DRAIX	France	44.13	6.33	851	7.779	0.2214	0.991967	18.2599	45.6426	21.33	1.32899
21	GRONINGEN	Netherlands	53.23	6.55	1	6.687	0.3337	0.975706	14.9171	30.4732	21.55	1.33345
22	LISTA	Norway	58.1	6.57	13	6.319	0.6391	0.907198	14.5155	27.0135	21.57	1.33385
23	EMMERICH	Germany	51.83	6.6	43	7.337	0.3648	0.975875	14.9835	31.4824	21.6	1.33445
24	TRIER	Germany	49.75	6.7	273	7.944	0.3153	0.984488	17.0806	37.6465	21.7	1.33646
25	WEIL AM RHEIN	Germany	47.3	7.4	249	8.042	0.1591	0.996101	17.0901	39.694	22.4	1.35025
26	BERN	Switzerland	46.95	7.43	511	8.147	0.3884	0.977774	18.96	44.522	22.43	1.35083
27	BELP	Switzerland	46.89	7.49	520	8.252	0.1004	0.998669			22.49	1.35199
28	MEIRINGEN	Switzerland	46.73	8.18	632	8.055	0.3723	0.979083	17.5684	41.3567	23.18	1.36511
29	KARLSRUHE	Germany	49.02	8.38	120	7.515	0.2124	0.992073	18.2969	41.0462	23.38	1.36884
30	CUXHAVEN	Germany	53.87	8.72	12	7.864	0.6173	0.94195	15.6114	31.5561	23.72	1.37511
31	BAD SALZUFLEN	Germany	52.1	8.73	100	7.477	0.3053	0.983606	16.58	34.7895	23.73	1.3753
32	LOCARNO	Switzerland	46.16	8.78	379	8.004	0.5	0.96244	18.45	44.0519	23.78	1.37621
33	KONSTANZ	Germany	47.68	9.18	447	8.176	0.1545	0.996439	18.79	43.4145	24.18	1.38346
34	STUTTGART	Germany	48.83	9.2	315	8.106	0.2291	0.992073	18.13	40.8236	24.2	1.38382
35	WUERZBURG	Germany	49.8	9.9	259	7.974	0.2201	0.99244	21.41	47.4767	24.9	1.3962
36	BRAUNSCHWEIG	Germany	52.3	10.45	88	8.677	0.5672	0.959022	17.27	36.148	25.45	1.40569
37	HOHENPEISSENBERG	Germany	47.8	11.02	977	7.739	0.1492	0.996296	17.13	39.359	26.02	1.41531
38	GARMISCH-PARTENKIRCHEN	Germany	47.48	11.07	720	8.261	0.1086	0.998274	18.68	43.3402	26.07	1.41614
39	NEUHERBERG	Germany	48.15	11.33	489	8.044	0.0996	0.998469	17.8	40.6425	26.33	1.42045
40	HOF-HOHENSAAS	Germany	50.32	11.88	567	8.215	0.2671	0.98954	18.3323	40.0269	26.88	1.42943
41	REGENSBURG	Germany	49.03	12.11	377	8.643	0.2711	0.990257	20.62	46.4169	27.11	1.43313
42	TAASTRUP	Denmark	55.67	12.3	28	6.697	0.5302	0.957964	16.79	32.8898	27.3	1.43616
43	LEIPZIG	Germany	51.35	12.43	125	7.34	0.3953	0.971821	18.9	40.4482	27.43	1.43823
44	BERLIN	Germany	52.47	13.4	50	7.945	0.363	0.979555	19.21	40.2222	28.4	1.45332
45	KLAGENFURT FLUGHAFEN	Austria	46.63	14.31	900	8.241	0.1423	0.997029	23.93	56.9384	29.31	1.46702
46	UHLIRSKA	Czech Republic	50.83	15.14	823	7.522	0.2088	0.992352	18.8507	40.7676	30.14	1.47914
47	PETZENKIRCHEN	Austria	48.15	15.15	252	7.624	0.2968	0.985069	18.745	42.8708	30.15	1.47929
48	GRAZ (UNIVERSITAET)	Austria	47.06	15.45	470	7.837	0.1379	0.996912	21.2	49.8192	30.45	1.48359
49	VIENNA (HOHE WARTE)	Austria	48.25	16.37	203	7.597	0.2061	0.992692	20.4976	46.9029	31.37	1.49651
50	PODERSDORF	Austria	47.85	16.85	120				21.4	49.4483	31.85	1.50311
51	LIPTOVSKY MIKULAS-ONDRASOVA	Slovakia	49.09	19.59	570	7.905	0.1434	0.996719	20.9647	47.1556	34.59	1.53895
52	KRAKOW (WOLA JUSTOWSKA)	Poland	50.06	19.84	205	7.849	0.1091	0.99807	20.67	45.544	34.84	1.54208
53	NAIMAKKA	Sweden	68.68	21.53	403	7.502	0.3324	0.980745	26.85	43.1093	36.53	1.56265
54	BREST	Belarus	52.09	23.7	136	7.873	0.5565	0.95697	22.83	48.4147	38.7	1.58771
55	L'VOV	Ukraine	49.81	23.95	329	7.678	0.7643	0.918131	22.51	49.9739	38.95	1.59051
56	RIGA	Latvia	56.97	24.07	3	10.152	1.4566	0.829278	22.41	43.2982	39.07	1.59184
57	ESPOO	Finland	60.18	24.83	30	7.557	0.2175	0.991783	22.99	42.0105	39.83	1.60021
58	ROVANIEMI	Finland	66.49	25.75	107	7.687	0.2511	0.989444	27.57	45.7645	40.75	1.61013
59	MINSK	Belarus	53.93	27.63	225	8.073	0.5621	0.95819	24.54	50.3066	42.63	1.62972
60	ST. PETERSBURG	Russian Federation	59.96	30.3	4	10.33	1.0341	0.908913	26.13	48.1103	45.3	1.6561
61	ODESSA	Ukraine	46.48	30.63	64	8.509	1.6317	0.772671	24.63	58.8363	45.63	1.65925
62	KANDALAKSA	Russian Federation	67.15	32.35	26	7.896	0.1378	0.996966	27.05	44.4324	47.35	1.67532
63	MURMANSK	Russian Federation	68.96	33.05	46	7.739	0.6115	0.941225	23.48	37.3787	48.05	1.68169
64	KALININ	Russian Federation	56.9	35.9	31	8.436	0.5005	0.966002	27.01	52.5251	50.9	1.70672
65	KURSK	Russian Federation	51.73	36.26	210	8.381	0.267	0.989953	28.03	60.1724	51.26	1.70978
66	RJAZAN	Russian Federation	54.61	39.71	135				27.49	55.7901	54.71	1.73807
67	VOLOGDA	Russian Federation	59.28	39.86	118	8.046	0.636	0.946753	28.88	53.9394	54.86	1.73926
68	ARKHANGELSK	Russian Federation	64.58	40.5	13	8.342	0.3957	0.980154	29.19	49.9794	55.5	1.74429
69	TAMBOV	Russian Federation	52.73	41.46	139				30.53	64.3806	56.46	1.75174
70	GOR'KIJ	Russian Federation	56.21	43.81	82	8.463	0.5832	0.963397	29.71	58.6382	58.81	1.76945
71	ASTRAKHAN	Russian Federation	46.25	48.03	-18	8.847	0.4071	0.979263	31.5	76.0007	63.03	1.79955
72	KIROV	Russian Federation	58.65	49.61	164	8.34	0.2283	0.992558	32.27	61.0902	64.61	1.8103
73	PERM	Russian Federation	58.01	56.18	161	6.677	0.716	0.915751	32.36	61.9553	71.18	1.85236
74	PECHORA	Russian Federation	56.11	57.1	56	8.639	0.6313	0.954139	34.74	68.9164	72.1	1.85794
86	LA CORUNA	Spain	43.36	-8.41	57	6.361	0.4732	0.94755	8.84	21.8113	6.59	0.818885
91	PONFERRADA	Spain	42.54	-6.59	555				16.58	42.9012	8.41	0.924796
92	CACERES TRUJILLO	Spain	39.46	-6.33	405	4.338	0.4582	0.899644	18.3818	51.467	8.67	0.938019
93	LEON/VIRGEN DEL CAMINO	Spain	42.58	-5.65	913	6.387	0.2472	0.985246	16.4273	42.4531	9.35	0.970812
98	SANTANDER	Spain	43.48	-3.8	52	6.61	0.3092	0.978585	10.0091	24.8	11.2	1.04922
